# Supplementary material for: A facile method of selective dissolution for preparation of Co3O4/LaCoO3 as a bifunctional catalyst for Al/Zn–air batteries
Source: Royal Society of Chemistry journal article supplement (doi:10.1039/d0se01636e), 2020-12-22
Supplement: d0se01636e1.pdf [file d0se01636e1.pdf]

## Electronic Supplementary Information

### **Facile method of selective dissolution for preparation of $\text{Co}_3\text{O}_4/\text{LaCoO}_3$ as bifunctional catalyst for Al/Zn-air battery**

Shanshan Yan<sup>†a</sup>, Liyang Wan<sup>†a</sup>, Yejian Xue<sup>\*a</sup>, Yan Wang<sup>ab</sup>, Guangjie Shao<sup>b</sup> and Zhaoping Liu<sup>\*a</sup>

<sup>a</sup> Advanced Li-ion Battery Engineering Laboratory and Key Laboratory of Graphene Technologies and Applications of Zhejiang Province, Ningbo Institute of Materials Technology and Engineering, Chinese Academy of Sciences, Ningbo 315201, P. R. China

<sup>b</sup> State Key Laboratory of Metastable Materials Science and Technology, Hebei Key Laboratory of heavy metal deep-remediation in water and resource reuse, College of Environmental and Chemical Engineering, Yanshan University, Qinhuangdao 066004, P. R. China

\* Corresponding author: xueyejian@nimte.ac.cn, liuzp@nimte.ac.cn

† These authors contributed equally to the work.

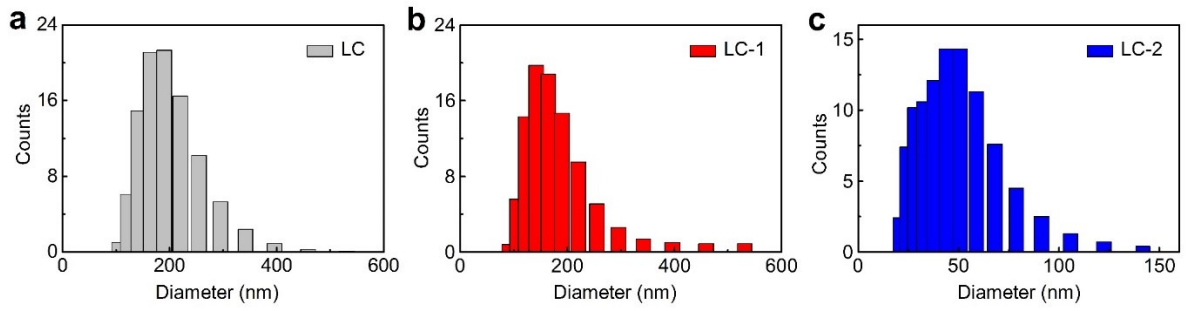

**Figure S1.** The particle size distribution histogram of LC (a), LC-1 (b) and LC-2 (c).

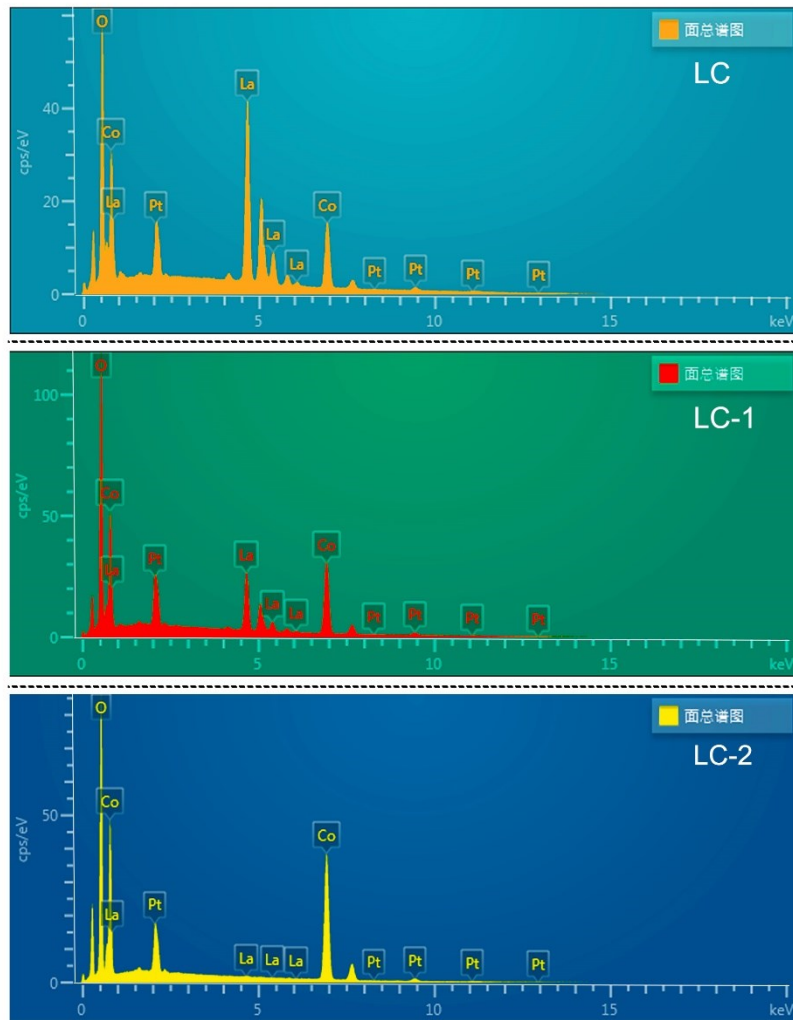

**Figure S2.** The EDS spectrum of the LC, LC-1 and LC-2 samples.

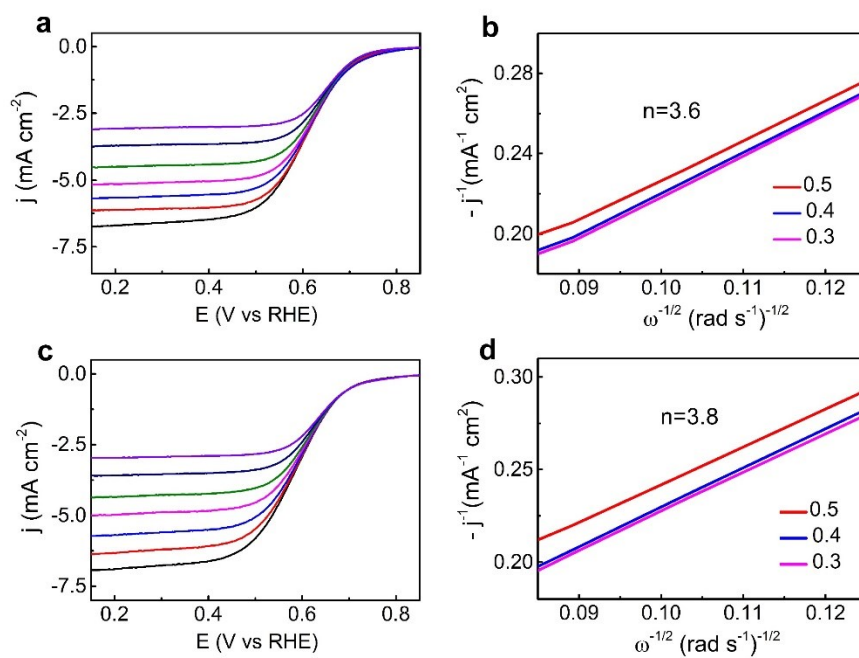

**Figure S3.** LSVs recorded at various rotation rates and the corresponding K-L plots at different potentials of LC (a-b) and LC-2 (c-d).

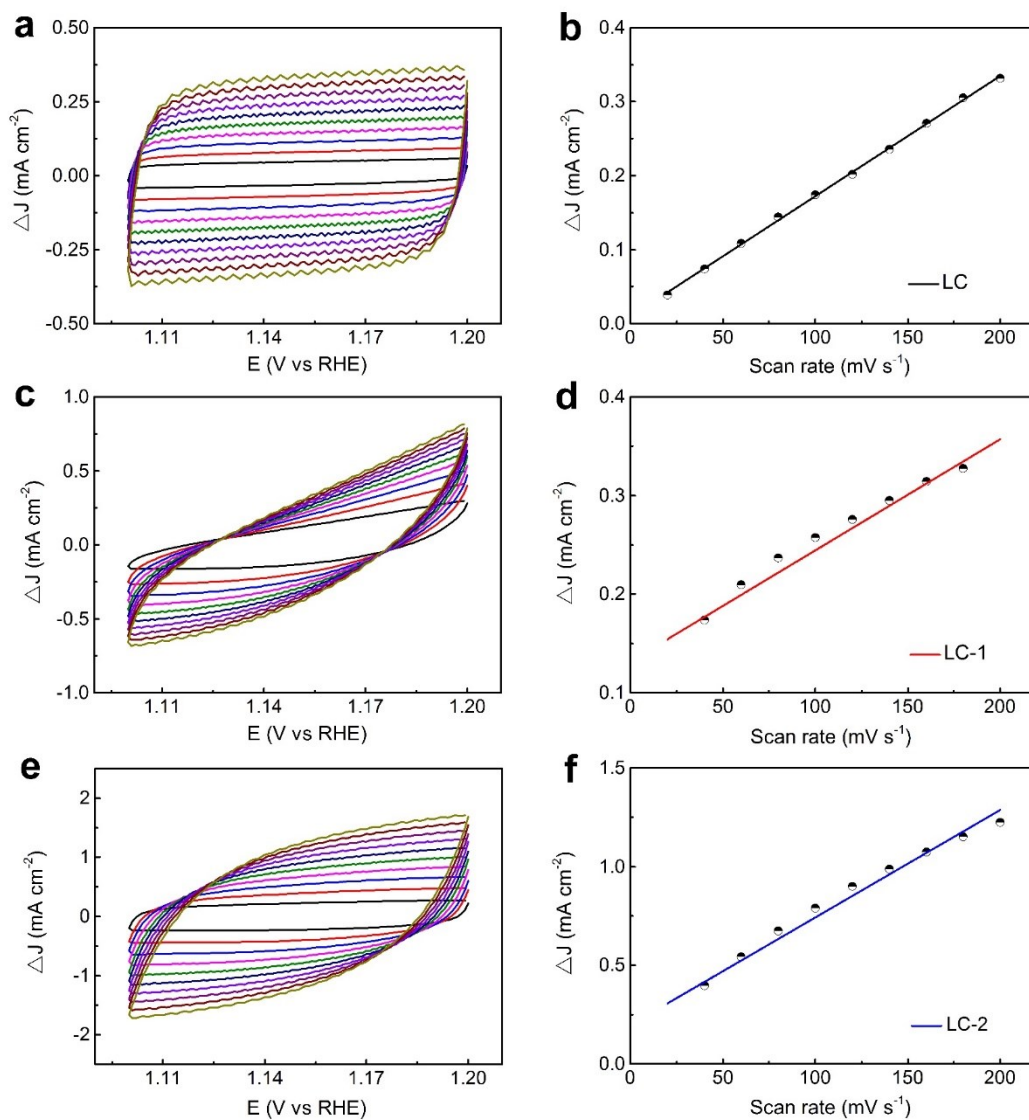

**Figure S4.** Cyclic voltammetry (CV) curves at different scan rates of 20, 40, 60, 80, 100, 120, 160, 180 and 200 mV s<sup>-1</sup> (from inner to outer) of (a) LC, (c) LC-1 and (e) LC-2 samples; Scan rate dependence of the current density at 1.15 V (vs. RHE) for (b) LC, (d) LC-1 and (f) LC-2 samples.

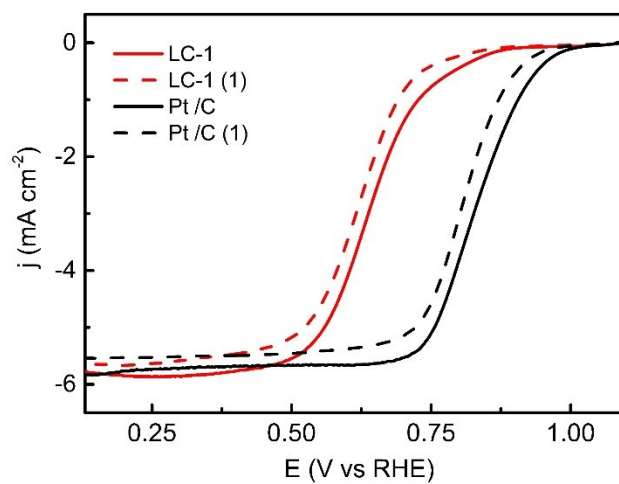

**Figure S5.** LSV curves before and after Chronoamperometric tests at 0.4 V (vs. RHE) for 40000s.

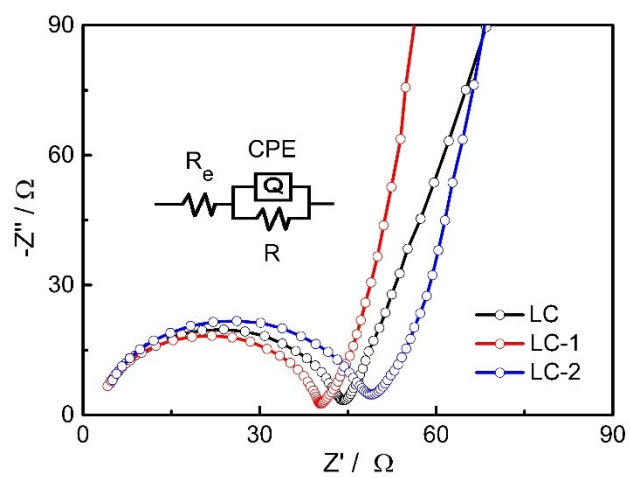

**Figure S6.** Electrochemical impedance spectra of different samples at 0.4 V (vs. RHE).

**Table 1** Elemental compositions and content of the different catalysts.

| Sample | EDS    |        |       |        | ICP    |        |       |
|--------|--------|--------|-------|--------|--------|--------|-------|
|        | La (%) | Co (%) | O (%) | Pt (%) | La (%) | Co (%) | O (%) |
| LC     | 58.02  | 22.93  | 12.36 | 6.70   | 58.35  | 18.81  | 22.84 |
| LC-1   | 30.74  | 40.23  | 19.41 | 9.62   | 29.38  | 38.35  | 32.27 |
| LC-2   | 0.65   | 66.43  | 22.2  | 10.72  | 2.24   | 58.98  | 38.78 |

**Table 2** Catalytic activity of the different samples.

| Sample                                                                            | ORR                                     |                                      |                                               | OER                      |                         |                          | Electrolyte                                   |                        |                        | Ref.      |           |
|-----------------------------------------------------------------------------------|-----------------------------------------|--------------------------------------|-----------------------------------------------|--------------------------|-------------------------|--------------------------|-----------------------------------------------|------------------------|------------------------|-----------|-----------|
|                                                                                   | <sup>a</sup> E <sub>j=-0.1</sub><br>(V) | <sup>b</sup> E <sub>1/2</sub><br>(V) | <sup>c</sup> Slope<br>(mV dec <sup>-1</sup> ) | E <sub>j=-3</sub><br>(V) | E <sub>j=2</sub><br>(V) | E <sub>j=10</sub><br>(V) | <sup>d</sup> Slope<br>(mV dec <sup>-1</sup> ) | <sup>e</sup> η<br>(mV) | <sup>f</sup> ΔE<br>(V) |           |           |
| LC                                                                                | 0.824                                   | 0.620                                | 113                                           | 0.614                    | 1.667                   | 1.824                    | 240                                           | 594                    | 1.210                  |           | this work |
| LC-1                                                                              | 0.895                                   | 0.640                                | 98                                            | 0.637                    | 1.595                   | 1.733                    | 135                                           | 503                    | 1.096                  |           | this work |
| LC-2                                                                              | 0.802                                   | 0.601                                | 102                                           | 0.594                    | 1.643                   | 1.777                    | 141                                           | 547                    | 1.183                  | 0.1 MKOH  | this work |
| Pt/C                                                                              | 1.012                                   | 0.850                                | 79                                            | 0.848                    | 1.773                   | –                        | 285                                           | –                      | –                      |           | this work |
| IrO <sub>2</sub> /C                                                               | –                                       | 0.619                                | 123                                           | 0.549                    | 1.530                   | 1.664                    | 98                                            | 434                    | 1.115                  |           | this work |
| PDA-C                                                                             | –                                       | 0.546                                | –                                             | –                        | 1.663                   | –                        | –                                             | –                      | –                      |           |           |
| Fe-PDA-C                                                                          | –                                       | 0.629                                | –                                             | –                        | 1.726                   | –                        | –                                             | –                      | –                      | 0.1 MKOH  | [1]       |
| Ni-PDA-C                                                                          | –                                       | 0.722                                | –                                             | –                        | 1.598                   | –                        | –                                             | –                      | –                      |           |           |
| Co-PDA-C                                                                          | –                                       | 0.767                                | –                                             | –                        | 1.601                   | –                        | –                                             | –                      | –                      |           |           |
| Ni <sub>1</sub> Mn <sub>1</sub>                                                   | –                                       | –                                    | –                                             | –                        | –                       | 1.580                    | 41                                            | 350                    | –                      |           |           |
| Ni <sub>3</sub> Mn <sub>1</sub>                                                   | –                                       | –                                    | –                                             | –                        | –                       | 1.620                    | 40                                            | 390                    | –                      | 1 M KOH   | [2]       |
| Ni <sub>5</sub> Mn <sub>1</sub>                                                   | –                                       | –                                    | –                                             | –                        | –                       | 1.650                    | 40                                            | 420                    | –                      |           |           |
| LaCoO <sub>3</sub>                                                                | –                                       | –                                    | 242.3                                         | –                        | –                       | 1.657                    | 91.3                                          | 427                    | –                      |           |           |
| La <sub>0.95</sub> CoO <sub>3-δ</sub>                                             | –                                       | –                                    | 198.9                                         | –                        | –                       | 1.639                    | 86.9                                          | 409                    | –                      | 0.1 M KOH | [3]       |
| La <sub>0.9</sub> CoO <sub>3-δ</sub>                                              | –                                       | –                                    | 189.7                                         | –                        | –                       | 1.610                    | 82.5                                          | 380                    | –                      |           |           |
| LaMnO <sub>3</sub>                                                                | –                                       | 0.680                                | 96                                            | –                        | –                       | –                        | –                                             | –                      | –                      |           |           |
| LaCoO <sub>3</sub>                                                                | –                                       | 0.668                                | 108                                           | –                        | –                       | 1.710                    | –                                             | 480                    | –                      |           |           |
| LaMn <sub>0.25</sub> Co <sub>0.75</sub> O <sub>3</sub>                            | –                                       | 0.700                                | 84                                            | –                        | –                       | 1.650                    | –                                             | 420                    | –                      | 0.1 M KOH | [4]       |
| LaMn <sub>0.3</sub> Co <sub>0.7</sub> O <sub>3</sub>                              | –                                       | 0.720                                | 89                                            | –                        | –                       | 1.646                    | –                                             | 416                    | –                      |           |           |
| LaMn <sub>0.35</sub> Co <sub>0.65</sub> O <sub>3</sub>                            | –                                       | 0.699                                | 105                                           | –                        | –                       | 1.659                    | –                                             | 429                    | –                      |           |           |
| LaMn <sub>0.5</sub> Co <sub>0.5</sub> O <sub>3</sub>                              | –                                       | 0.680                                | 96                                            | –                        | –                       | 1.670                    | –                                             | 440                    | –                      |           |           |
| Sm <sub>0.5</sub> Sr <sub>0.5</sub> CoO <sub>3-δ</sub> hollow nanofibers (SSC-HF) | 0.760                                   | –                                    | 142                                           | –                        | –                       | 1.770                    | 215                                           | 540                    | –                      |           |           |
| 3D, N-doped graphene                                                              | 0.590                                   | –                                    | 84                                            | –                        | –                       | 1.880                    | 218                                           | 650                    | –                      | 0.1 M KOH | [5]       |
| SSC-HF-3DNG                                                                       | 0.860                                   | –                                    | 76                                            | –                        | –                       | 1.630                    | 115                                           | 400                    | –                      |           |           |

<sup>a</sup>E<sub>0</sub>: the potential at  $-0.1 \text{ mA cm}^{-2}$ ; <sup>b</sup>E<sub>1/2</sub>: the potential at half of the limiting current density; <sup>c</sup>Slope: Tafel slope for ORR; <sup>d</sup>Slope: Tafel slope for OER; <sup>e</sup>η: the overpotential  $\eta = E_{j=10 \text{ mA cm}^{-2}} - 1.23 \text{ V (vs. RHE)}$ ; <sup>f</sup>ΔE: the difference between ORR current density at  $-3 \text{ mA cm}^{-2}$  and OER current density at  $10 \text{ mA cm}^{-2}$ .

**Table 3** Surface elemental compositions (from XPS results) and O<sub>2</sub> desorption of the three samples.

| Sample | Co <sup>2+</sup><br>(%) | Co <sup>3+</sup><br>(%) | Co <sup>2+</sup> /Co <sup>3+</sup> | O <sub>ads</sub><br>(%) | O <sub>latt</sub><br>(%) | O <sub>ads</sub> /O <sub>latt</sub> | O <sub>2</sub> desorption<br>( $\mu\text{mol g}^{-1}$ ) |
|--------|-------------------------|-------------------------|------------------------------------|-------------------------|--------------------------|-------------------------------------|---------------------------------------------------------|
| LC     | 21.5                    | 68.9                    | 0.31                               | 37.86                   | 39.37                    | 0.96                                | 337.15                                                  |
| LC-1   | 40.9                    | 46.6                    | 0.88                               | 49.69                   | 36.06                    | 1.38                                | 3848.15                                                 |
| LC-2   | 43.1                    | 47.4                    | 0.91                               | 37.58                   | 44.64                    | 0.84                                | 872.85                                                  |

## Reference

- [1] C. Cui, G. Du, K. Zhang, T. An, B. Li, X. Liu, Z. Liu, *J. Alloy. Compd.*, 2020, **814**, 152239.
- [2] B. Li, Y. Chen, X. Ge, J. W. Chai, X. Zhang, T. S. A. Hor, G. Du, Z. Liu, H. Zhang, Y. Zong, *Nanoscale*, 2016, **8**, 5067-5075.
- [3] A. Sumboja, J. Chen, Y. Zong, P. S. Lee, Z. Liu, *Nanoscale*, 2017, **9**, 774–780.
- [4] H. Wang, X. Chen, D. Huang, M. Zhou, D. Ding, H. Luo, *ChemCatChem*, 2020, **12**, 2768–2775.
- [5] J. Sun, L. Du, B. Sun, G. Han, Y. Ma, J. Wang, H. Huo, C. Du, G. Yin, *ACS Appl. Mater. Interfaces*, 2020, **12**, 24717-24725.
- [6] Y. Bu, G. Nam, S. Kim, K. Choi, Q. Zhong, J. Lee, Y. Qin, J. Cho, G. Kim, *Small*, 2018, **14**, 18027.
